# Supplementary material for: Exploring type I interferon pathway: virulent vs. attenuated strain of African swine fever virus revealing a novel function carried by MGF505-4R
Source: Front Immunol. 2024 Mar 11;15:1358219. doi: 10.3389/fimmu.2024.1358219 (PMC10961335; doi:10.3389/fimmu.2024.1358219)
Supplement: Supplementary file 1 [file Table_1.xlsx]

## Sheet: Feuil1
ASFV GENE	Forward sequence	Reverse sequence
p30 (CP204L)	TTCAGTATACCCTTGCCCTGC	CGGTAGAATTGTTACGACCGC
p72	TACTGCGAATACCCCGGAGA	AGCGTTGTGACATCCGAACT
MGF360-12L	TGTTGACAGATACCAGCCCG	TACGGCGTTAGTGAAGGCTG
MGF360-13L	TGCCGCTGGTTTTATTGTGC	ACGAAGCACATCCGAGAGTT
MGF360-14L	TTTCCAGAAGACGGGGTTCG	TGGGGCGCAAATCCTGAATA
MGF505-2R	GCCTTAAGAATGGCGGGAGA	CCCTGCAAGGCTCCTATGAC
G_ACD_00520	TCTCAAACCAGTGAACAACAGTC	TCCGACAGATGTCTTGAAGAGAAA
MGF505-3R	GTGGGAGTATTGCAGCCAGA	AACTTTGCCGACGCCTAGAA
MGF505-4R	AGCGCTAGGACTATACTGGGA	GCGATTCTCAGGGCCTCATT
MGF360-11L	TGCCCGCTTCACTTTCTGAT	AGCTTCCCATCGTTCCCTTG
A151R	AGATTTGGAGTGGTGAGCCG	AGGACCGACTGAGGTTGAAACA
MGF360-21R	CGGCAAGCTTCAAAGAAGGC	TGCACCCCACTTGGTAAACA
I267L	TTCGGGAGTGGGCTTTCATC	AGCTGTTCTTTCATGGCGGA
MGF505-7R	CCTTCAGGACCTCTGTCGGA	AGATCCATGCCCCTTCCAGT
R298L	CCATACCTATCGTCCACACGG	GACGAAACCCGTCCCCAATA
DP96R	GAAACGACTGCACGAATGGG	GGGGATTTAGCGCCAAGACT
DP71L	GGAAGCGGAACCGATCGAC	GAACGACGCGAAGCATGTC
C962R	GATCCAGACTGCCAAAACGC	TTCGCTCTCAATGGTGGGAC
A224L	CCCAAGGTTGCACGCATAAA	AACATGCTACTGTTGCGGAATG
MGF360-9L	CGACAGGCCCACTTTAGCAT	CTACATCGGTGGCGGCTTAT
DP148R	GGGTTCTTACCCCTCAGCAG	GGTTAAGAAGGGGGCCAGAC
DP238L	TCCTACAATAGAATCGGTGTCATCC	AATGGAGGAGGAGGATTGCG
B407L	AGGCGGTCTACTTGCTTTGT	TGCAGAGTCTGAGGCATCTC
EP296R	TCCAGCTATAATGACGCGGG	ATACCGCTTCCGCATTCTGT
MGF100-1R	CCACCCTCCAGAAGATTGTTGT	CCACCGAATCCTTTACGACCA
MGF505-9R	TTGCAGCCTCGGAAGGAAAT	TCAGATCATATTGCCTGCCCTC
MGF100-3L	CCGTTTCTAGATCTTTTTGGGCA	ATCCGACCATGAAATAGAACGTATG
MGF360-6L	CCAAGGCTCTGTCAAGCTCA	GGTGGGAAAACGGACCCATA
S183L	AGCAGACTCTACATTACGCGG	GTTTTTCGCTGACCCGCTTG
I8L	TTATTCGCGTGTTCGTTGGG	GGCGTTTACTATTCAATGAACCCT
I226R	AGCAGACTCTACATTACGCGG	GTTTTTCGCTGACCCGCTTG
C315R	GTTATCGCAGCCATCCTTGC	CTGACCGCACTCTTCGCATA
MGF360-1Lb	AGGTCCTGGTGCACTCCATA	GAAGGCTGTACAGGAAAACAATCA
